# Supplementary material for: The Genome of a Pathogenic Rhodococcus: Cooptive Virulence Underpinned by Key Gene Acquisitions
Source: PLOS journal article supplement (doi:10.1371/journal.pgen.1001145), 2010-09-30
Supplement: S27 (10.1371/journal.pgen.1001145.s027) [file journal.pgen.1001145.s027]

**Table S12**

| <b>Software</b>                    | <b>Analysis</b>                                                                                                                             | <b>Reference</b> |
|------------------------------------|---------------------------------------------------------------------------------------------------------------------------------------------|------------------|
| Alien Hunter                       | Detection of local compositional biases using variable-order motif distributions method to identify horizontally acquired (HGT) DNA regions | [92]             |
| Artemis                            | Genome viewer and annotation tool                                                                                                           | [117]            |
| Artemis Comparison Tool (ACT)      | Genome sequence multiple alignment and comparison viewer                                                                                    | [118]            |
| BLASTCLUST                         | Clustering of proteomes                                                                                                                     | [119]            |
| BioLayout Express <sup>3D</sup>    | Network analysis of microarray expression data                                                                                              | [74,75]          |
| BLAST                              | Homology prediction                                                                                                                         | [119]            |
| GLIMMER, RBS finder & TransTermHP  | Automated detection of potential coding sequences (CDSs), Shine-Dalgarno sequences and rho-independent transcription terminators            | [120]            |
| Pathway Tools                      | Metabolic pathway reconstruction                                                                                                            | [121]            |
| PFAM database                      | Domain-based identification of protein families                                                                                             | [122]            |
| PROSITE                            | Prediction of lipoproteins and proteins recognized by sortases                                                                              | [123]            |
| Reciprocal best-match BLASTP/FASTA | Determination of orthologous gene sets                                                                                                      | [119]            |
| REPuter                            | Sequence repeats                                                                                                                            | [124]            |
| RFAM database                      | Stable non-coding RNAs                                                                                                                      | [125]            |
| SignalP                            | Secreted proteins                                                                                                                           | [126]            |
| TMHMM                              | Membrane/transmembrane proteins                                                                                                             | [127]            |
